# Supplementary material for: Geotemporospatial and causal inferential epidemiological overview and survey of USA cannabis, cannabidiol and cannabinoid genotoxicity expressed in cancer incidence 2003–2017: part 3 – spatiotemporal, multivariable and causal inferential pathfinding and exploratory analyses of prostate and ovarian cancers
Source: Arch Public Health. 2022 Mar 30;80:101. doi: 10.1186/s13690-022-00813-6 (PMC8969240; doi:10.1186/s13690-022-00813-6)
Supplement: Supplementary file 1 — Additional file 1. [file 13690_2022_813_MOESM1_ESM.xlsx]

## Sheet: Abbrev
		Supplementary Table No.	Table Name and Description
		1	Prostate Mixed Effects Models
		2	Prostate Mixed Effects Models for Cannabinoids
		3	Prostate Robust Regressoin - Cannabinoids and Ethnicity
		4	Prostate Panel Regression - Introductory Models
		5	Prostate Panel Regression - Lagged Models
		6	Prostate Panel Regression - Lagged Interactive Models
		7	Ovary Mixed Effects Models
		8	Ovary Mixed Effects Models for Cannabinoids
		9	Ovary Robust Regression - Introductory Models
		10	Ovary Robust Regression - Cannabinoids and Ethnicity
		11	Ovary Panel Regression - Introductory Models
		12	Ovary Panel Regression - Lagged Models
		13	Ovary Panel Regression - Lagged Interactive Models

## Sheet: ST1 Pros lme
	Parameter			Model
	Parameter	Estimate (C.I.)	P-Value	Sigma	AIC	BIC	LogLik
	Cannabis
	lme(Cancer Rate ~ Cannabis)
	Cannabis	-35.82 (-40.7, -30.93)	2.99e-41	22.1181	7265.12	7283.59	-3628.56	***
	THC
	lme(Cancer Rate ~ Cannabis)
	THC	-29.22 (-30.88, -27.55)	9.78e-153	15.4316	6766.4	-3369.96	-1985.23	***
	Cannabigerol
	lme(Cancer Rate ~ Cannabigerol)
	Cannabigerol	-40.93 (-43.26, -38.6)	0	15.3718	6764.73	6783.19	-3378.36	***
	Cannabidiol
	lme(Cancer Rate ~ Cannabidiol)
	Cannabidiol	25.09 (23.31, 26.87)	1.86e-32	17.4188	6939.47	6957.94	-3465.73	***
	Additive Model - Drugs
	lme(Cancer Rate ~ Age + Cigarettes + AUD + Cannabis + Analgesics + Cocaine
	AUD	401.85 (328.54, 475.16)	5.16e-25	11.2249	6420.41	6457.31	-3202.21	***
	Cannabis	-5.89 (-10.42, -1.36)	0.011					*
	Analgesics	-109.55 (-171.51, -47.58)	0.0006					***
	Cigarettes	-275.72 (-305.15, -246.29)	1.06e-61					***
	Additive Model - Comprehensive
	lme(Cancer Rate ~ Age + Cigarettes + AUD + Cannabis + Analgesics + Cocaine + Income + Five Races)
	AIAN	920.32 (797.42, 1043.22)	1.23e-42	7.82484	5926.37	5990.82	-2949.18	***
	Hispanic	30.67 (22.84, 38.5)	5.59e-14					***
	AUD	218.58 (151.46, 285.7)	3.2e-10					***
	African	8.36 (3.88, 12.85)	0.000278					***
	Caucasian	31.57 (8.69, 54.45)	0.00701					**
	Analgesics	-46.97 (-93.04, -0.91)	0.046					*
	Asian	-23.23 (-28.9, -17.56)	4.18e-15					***
	Cannabis	-19.37 (-23.08, -15.66)	5.16e-23					***
	Income	-33.31 (-39.33, -27.29)	2.12e-25					***
	Cigarettes	-219.95 (-247.78, -192.13)	1.14e-46					***
	Age	-9.69 (-10.72, -8.66)	3.37e-62					***
	Interactive Model - Comprehensive
	lme(Cancer Rate ~ Age + Cigarettes * AUD * Cannabis + Analgesics + Cocaine + Income + Five Races)
	AIAN	881.95 (770.54, 993.36)	9.46e-47	6.77707	5707.96	5790.73	-2835.98	***
	Hispanic	46.93 (38.33, 55.52)	7.84e-25					***
	Cigarettes: Cannabis	498.96 (382.1, 615.82)	3.27e-16					***
	Cannabis: AUD	1617.85 (1218.1, 2017.59)	8.76e-15					***
	AUD	4484.58 (3347.44, 5621.71)	3.85e-14					***
	Cigarettes	1203.78 (867.76, 1539.8)	5.3e-12					***
	African	15.82 (11.33, 20.3)	1.08e-11					***
	Analgesics	118.23 (72.52, 163.95)	5.15e-07					***
	Caucasian	-47.11 (-69.79, -24.43)	5.22e-05					***
	Cigarettes: AUD	-17471.82 (-22930.93, -12012.71)	6.28e-10					***
	Cigarettes: Cannabis: AUD	-6394.11 (-8326.73, -4461.49)	1.7e-10					***
	Cannabis	-131.38 (-153.57, -109.19)	1.48e-28					***
	Income	-33.79 (-39.47, -28.11)	9.1e-29					***
	Asian	-36.75 (-42.39, -31.11)	1.17e-33					***
	Age	-9.46 (-10.4, -8.52)	3.98e-69					***

## Sheet: ST2 Pros lme Comp
	Parameter			Model
	Parameter	Estimate (C.I.)	P-Value	Sigma	AIC	BIC	LogLik
	Interactive Cannabinoid Model - Comprehensive
	lme(Cancer Rate ~ Age + Cigarettes * THC * CBG * CBD + AUD + Analgesics + Cocaine + Income + Five Races)
	Cigarettes: THC	1333.18 (1063.88, 1602.48)	6.16e-21	6.611	5602.14	5703.19	-2779.07	***
	Cigarettes: THC: CBD	325.24 (255.34, 395.14)	8.38e-19					***
	AUD	220.59 (170.49, 270.69)	4.33e-17					***
	Cocaine	375.6 (259.48, 491.73)	4.19e-10					***
	Hispanic	19.59 (13.14, 26.03)	4.23e-09					***
	African	10.66 (6.5, 14.81)	6.48e-07					***
	AIAN	279.05 (149.09, 409.01)	2.91e-05					**
	Cigarettes: CBD	-576.58 (-744.69, -408.46)	3.79e-11					**
	Cigarettes	-2368.06 (-3046.67, -1689.44)	1.77e-11					***
	Cigarettes: CBG	-750.79 (-954.82, -546.76)	1.47e-12					***
	Cigarettes: CBG: CBD	-196.06 (-246.57, -145.56)	9.25e-14					***
	Income	-26.64 (-32.83, -20.45)	1.99e-16					***
	Age	-5.81 (-6.92, -4.7)	5.36e-23					***
	THC: CBD	-160.44 (-187.79, -133.09)	4.38e-28					***
	THC: CBG: CBD	-36.43 (-42.37, -30.49)	2.57e-30					***
	Asian	-34.9 (-40.57, -29.23)	1.68e-30					***
	THC	-666.07 (-772.99, -559.15)	3.81e-31					***
	THC: CBG	-149.36 (-172.64, -126.08)	9.45e-33					***
	Analgesics	-389.13 (-441.62, -336.65)	7.14e-42					***

## Sheet: ST3 Pros SG
	Parameter	Estimate (C.I.)	P-Value
	Additive Cannabinoid Model - Comprehensive
	svyglm(Cancer Rate ~ Age + Cigarettes + THC + CBG + CBD + AUD + Analgesics + Cocaine + Income + Five Races)
	Cigarettes	157.45 (114.81, 200.08)	6.65e-09	***
	CBD	8.78 (5.32, 12.24)	1.17e-05	***
	AUD	65.24 (36.66, 93.81)	5.74e-05	***
	Cocaine	128.07 (52.48, 203.65)	0.00186	**
	Hispanic	-5.21 (-8.05, -2.37)	0.000849	***
	Age	-1.03 (-1.38, -0.68)	8.86e-07	***
	Analgesics	-764.71 (-956.09, -573.33)	9.63e-10	***
	Interactive Cannabinoid Model - Comprehensive
	svyglm(Cancer Rate ~ Age + Cigarettes * THC * CBG * CBD + AUD + Analgesics + Cocaine + Income + Five Races)
	THC: CBD: AUD	4771.46 (3476.99, 6065.94)	2.32e-08	***
	THC: AUD	14621.79 (9321.29, 19922.29)	5.09e-06	***
	AUD	6903.91 (4234.05, 9573.76)	1.4e-05	***
	CBG: AUD	2046.32 (1216.87, 2875.78)	2.8e-05	***
	THC: CBG: CBD: AUD	1042.16 (589.17, 1495.15)	7.36e-05	***
	THC: CBG: AUD	3432.94 (1597.22, 5268.66)	0.000835	***
	Cocaine	317.11 (128.64, 505.58)	0.00229	**
	THC: CBG	-203.25 (-360.97, -45.54)	0.0164	*
	THC: CBG: CBD	-64.56 (-103.11, -26.02)	0.00238	**
	THC	-906.51 (-1357.96, -455.06)	0.000389	***
	CBG	-170.27 (-242.21, -98.33)	5.02e-05	***
	Age	-0.96 (-1.3, -0.61)	4.74e-06	***
	CBG: CBD	-1.59 (-2.12, -1.05)	1.52e-06	***
	THC: CBD	-309.01 (-412.7, -205.33)	1.38e-06	***
	Hispanic	-6.37 (-8.24, -4.51)	1.09e-07	***

## Sheet: ST4 Pros plm Intro
	Parameter	Estimate (C.I.)	P-Value	Model Parameters	Value
	Additive Model - Drugs
	plm(Cancer Rate ~ Age + Cigarettes + AUD + Cannabis + Analgesics + Cocaine
	Cigarettes	170.66 (158.91, 182.41)	<2.2E-16	S.D.	26.151	***
	AUD	89.54 (71.23, 107.77)	<2.2E-16	Adj.R-Squared	0.1928	***
	Age	-0.46 (-0.63, -0.29)	1.25e-07	F	494.236	***
	Cannabis	-5.73 (-7.37, -4.09)	1.6e-11	Deg.Freedom	5744	***
	Analgesics	-417.4 (-466.2, -367.8)	<2.2E-16	P-Value	<2.2E-16	***
	Additive Model - Comprehensive
	lme(Cancer Rate ~ Age + Cigarettes + AUD + Cannabis + Analgesics + Cocaine + Income + Five Races)
	AUD	144.82 (116.18, 173.45)	7.95e-22	S.D.	23.7909	***
	Asian	7.56 (5.69, 9.44)	9.44e-15	Adj.R-Squared	0.2559	***
	Cigarettes	92.24 (60.33, 124.15)	2.1e-08	F	314.545	***
	Hispanic	-2.45 (-3.93, -0.97)	0.00126	Deg.Freedom	10739	***
	AIAN	-83.57 (-121.9, -45.23)	2.19e-05	P-Value	<2.2E-16	***
	African	-3.14 (-4.07, -2.21)	5.87e-11			***
	Income	-21.97 (-27.57, -16.37)	4.73e-14			***
	Cannabis	-8.93 (-10.68, -7.17)	5.66e-22			***
	Age	-1.62 (-1.89, -1.35)	1.53e-28			***
	Analgesics	-457 (-503.13, -410.87)	3.6e-68			***
	Interactive Model - Comprehensive
	plm(Cancer Rate ~ Age + Cigarettes * AUD * Cannabis + Analgesics + Cocaine + Income + Five Races)
	Cocaine	237.06 (194.52, 279.6)	7.71e-26	S.D.	19.227	***
	Cigarettes: AUD	14157.01 (10124.78, 18189.24)	1.27e-11	Adj.R-Squared	0.3533	***
	Asian	4.07 (2.35, 5.78)	3.99e-06	F	347.56	***
	Cigarettes: Cannabis: AUD	4672.52 (2526.18, 6818.86)	2.24e-05	Deg.Freedom	15734	***
	Cannabis	55.5 (20.98, 90.02)	0.00169	P-Value	<2.2E-16	**
	Caucasian	-11.34 (-20.25, -2.43)	0.0128			*
	Cigarettes: Cannabis	-275.54 (-421.49, -129.58)	0.000232			***
	Cannabis: AUD	-1048.34 (-1572.59, -524.08)	9.71e-05			***
	AIAN	-73.67 (-104.27, -43.06)	2.86e-06			***
	Income	-14.23 (-19.07, -9.38)	1.26e-08			***
	AUD	-2872.26 (-3836.15, -1908.37)	7.82e-09			***
	Cigarettes	-846.53 (-1128.56, -564.49)	6.13e-09			***
	Hispanic	-7.98 (-9.48, -6.48)	7.18e-24			***
	Analgesics	-282.58 (-329.98, -235.18)	4.8e-29			***
	Age	-1.74 (-2.02, -1.46)	1.78e-31			***
	Additive Cannabinoid Model - Comprehensive
	plm(Cancer Rate ~ Age + Cigarettes + THC + CBG * CBD + AUD + Analgesics + Cocaine + Income + Three Races)
	CBD	12.43 (10.9, 13.95)	1.8e-57	S.D.	14.7561	***
	African	5.4 (3.97, 6.82)	1.15e-13	Adj.R-Squared	0.0867	***
	AUD	77.63 (55.86, 99.39)	2.76e-12	Chi Squ.	5882.79	***
	Cigarettes	79.45 (56.96, 101.94)	4.36e-12	Deg.Freedom	11	***
	THC	17.09 (11.16, 23.01)	1.57e-08	P-Value	<2.2E-16	***
	Caucasian	25 (12.05, 37.94)	0.000153			***
	Age	-0.6 (-1, -0.21)	0.00245			***
	Hispanic	-6.03 (-7.89, -4.17)	2.22e-10			***
	Income	-13.96 (-18.01, -9.9)	1.54e-11			**
	CBG	-25.4 (-32.6, -18.2)	4.8e-12			***
	Analgesics	-481.72 (-521.8, -441.64)	1.12e-122			***
	Interactive Cannabinoid Model - Comprehensive
	plm(Cancer Rate ~ Age + Cigarettes * THC * CBG * CBD + AUD + Analgesics + Cocaine + Income + Three Races)
	African	14.87 (12.68, 17.05)	2e-40	S.D.	18.3478	***
	Cigarettes	85.16 (71.05, 99.27)	2.74e-32	Adj.R-Squared	0.0398	***
	Caucasian	105.12 (86.23, 124.01)	1.09e-27	Chi Squ.	3927.53	***
	CBD	12.14 (9.71, 14.57)	1.34e-22	Deg.Freedom	9	***
	Age	-2.11 (-2.71, -1.51)	5.68e-12	P-Value	<2.2E-16	***
	THC: CBG: CBD	-43.36 (-50.02, -36.7)	2.6e-37			***
	THC: CBG	-172.76 (-198.76, -146.76)	8.89e-39			***
	THC: CBD	-135.01 (-153.1, -116.92)	1.86e-48			***
	THC	-541.34 (-611.86, -470.82)	3.67e-51			***

## Sheet: ST5 Pros plm Lag Add
	Lagged Variables	Parameter	Estimate (C.I.)	P-Value	Model Parameters	Value
		Additive Models
		Comprehensive Additive Cannabinoid Model - 0 Lags
		plm(Cancer Rate ~ Age + Cigarettes + THC + CBG * CBD + AUD + Analgesics + Cocaine + Income + Three Races)
		Cigarettes	163.571 (143.82, 183.32)	2.89661e-59	S.D.	17.5136
		CBD	10.2464 (8.74, 11.76)	2.64548e-40	Adj.R-Squared	0.201232
		Cocaine	131.99 (98.34, 165.64)	1.50612e-14	Chi Squ.	5245.61
		Asian	11.728 (8.09, 15.37)	2.799e-10	Deg.Freedom	10
		THC	11.2708 (6.81, 15.74)	7.55151e-07	P-Value	<2.2E-16
		Caucasian.American	-16.6009 (-31.49, -1.71)	0.0288938
		Income	-4.4633 (-8.33, -0.6)	0.0237328
		CBG	-15.7429 (-21.32, -10.17)	3.14149e-08
		Hispanic	-18.7122 (-22.01, -15.41)	1.02728e-28
		Analgesics	-642.652 (-691.23, -594.08)	3.00091e-148
		Comprehensive Additive Cannabinoid Model - 2 Lags
		plm(Cancer Rate ~ Age + Cigarettes + THC + CBG * CBD + AUD + Analgesics + Cocaine + Income + Three Races)
	THC, 2	Cigarettes	156.31 (142.97, 169.65)	1.15619e-116	S.D.	15.6557
	CBG, 2	Asian	13.79 (10.52, 17.06)	1.27072e-16	Adj.R-Squared	0.000654792
	CBD,. 2	Caucasian.American	39.54 (24.4, 54.68)	3.07294e-07	Chi Squ.	4298.12
		African.American	4.2 (2.55, 5.84)	5.57194e-07	Deg.Freedom	8
		Age	-0.57 (-1, -0.14)	0.0101698	P-Value	<2.2E-16
		Hispanic	-4.88 (-7.62, -2.14)	0.000484181
		AUD	-100.21 (-114.92, -85.49)	1.20454e-40
		THC	-8.95 (-10.07, -7.83)	1.18533e-55
		Comprehensive Additive Cannabinoid Model - 4 Lags
		plm(Cancer Rate ~ Age + Cigarettes + THC + CBG * CBD + AUD + Analgesics + Cocaine + Income + Three Races)
	THC, 4	CBG	34.52 (25.5, 43.54)	6.31236e-14	S.D.	16.6697
	CBG, 4	Age	1.2 (0.75, 1.65)	1.69496e-07	Adj.R-Squared	0.0254173
	CBD,. 4	African.American	5.09 (2.91, 7.26)	4.59803e-06	Chi Squ.	3075.55
		Cigarettes	55.76 (27.65, 83.87)	0.000100956	Deg.Freedom	8
		CBD	3.76 (1.39, 6.14)	0.00192476	P-Value	<2.2E-16
		Income	-8.18 (-12.58, -3.77)	0.000277202
		AUD	-59.67 (-81.94, -37.41)	1.49956e-07
		THC	-42.69 (-50.5, -34.88)	8.83825e-27
		Comprehensive Additive Cannabinoid Model - 6 Lags
		plm(Cancer Rate ~ Age + Cigarettes + THC + CBG * CBD + AUD + Analgesics + Cocaine + Income + Three Races)
	THC, 6	CBG	34.52 (25.5, 43.54)	6.31236e-14	S.D.	16.6697
	CBG, 6	Age	1.2 (0.75, 1.65)	1.69496e-07	Adj.R-Squared	0.0254173
	CBD,. 6	African.American	5.09 (2.91, 7.26)	4.59803e-06	Chi Squ.	3075.55
		Cigarettes	55.76 (27.65, 83.87)	0.000100956	Deg.Freedom	8
		CBD	3.76 (1.39, 6.14)	0.00192476	P-Value	<2.2E-16
		Income	-8.18 (-12.58, -3.77)	0.000277202
		AUD	-59.67 (-81.94, -37.41)	1.49956e-07
		THC	-42.69 (-50.5, -34.88)	8.83825e-27
		Comprehensive Additive Cannabinoid Model - 8 Lags
		plm(Cancer Rate ~ Age + Cigarettes + THC + CBG * CBD + AUD + Analgesics + Cocaine + Income + Three Races)
	THC, 8	CBG	79.98 (67.44, 92.52)	7.41601e-36	S.D.	15.7601
	CBG, 8	African.American	7.14 (5.52, 8.76)	5.69037e-18	Adj.R-Squared	0.0444513
	CBD,. 8	Caucasian.American	38.15 (20.08, 56.21)	3.49917e-05	Chi Squ.	2657.77
		CBD	-11.03 (-14.37, -7.69)	9.45175e-11	Deg.Freedom	5
		THC	-79.13 (-89.73, -68.54)	1.50121e-48	P-Value	<2.2E-16
	2.60324	0.225306	11.5542	7.02838e-31	2.16164	3.04483
	67.4332	6.28258	10.7334	7.09609e-27	55.1196	79.7468
	6.98832	1.00228	6.97243	3.11506e-12	5.02389	8.95275
	-11.6559	3.80277	-3.06511	2.17592e- 3	-19.1092	-4.2026
	-6.12463	1.11684	-5.48388	4.16105e- 8	-8.3136	-3.93566
	-5.4858	0.77693	-7.06087	1.65469e-12	-7.00855	-3.96304
	-49.5082	4.97482	-9.95177	2.47741e-23	-59.2587	-39.7578
	163.571	10.0758	16.2341	2.89661e-59	143.823	183.319
	10.2464	0.770986	13.29	2.64548e-40	8.73531	11.7575
	131.99	17.1706	7.68701	1.50612e-14	98.3366	165.644
	11.728	1.85878	6.30952	2.799e-10	8.08489	15.3712
	11.2708	2.27848	4.94661	7.55151e-07	6.80503	15.7365
	-16.6009	7.59791	-2.18493	0.0288938	-31.4925	-1.70929
	-4.4633	1.97366	-2.26143	0.0237328	-8.3316	-0.594987
	-15.7429	2.84509	-5.53336	3.14149e-08	-21.3192	-10.1666
	-18.7122	1.68308	-11.1178	1.02728e-28	-22.011	-15.4134
	-642.652	24.7834	-25.9307	3.00091e-148	-691.227	-594.078
	156.308	6.80768	22.9605	1.15619e-116	142.965	169.651
	13.7896	1.66615	8.27629	1.27072e-16	10.524	17.0552
	39.5369	7.72368	5.11892	3.07294e-07	24.3987	54.675
	4.19553	0.838186	5.00549	5.57194e-07	2.55272	5.83835
	-0.568213	0.221094	-2.57	0.0101698	-1.00155	-0.134876
	-4.87605	1.3974	-3.48936	0.000484181	-7.61491	-2.13718
	-100.206	7.50674	-13.3487	1.20454e-40	-114.919	-85.4926
	-8.94871	0.569421	-15.7155	1.18533e-55	-10.0648	-7.83267
	34.5218	4.60203	7.50143	6.31236e-14	25.502	43.5416
	1.19624	0.228727	5.23002	1.69496e-07	0.747948	1.64454
	5.08471	1.10963	4.58234	4.59803e-06	2.90987	7.25955
	55.7622	14.3411	3.88828	0.000100956	27.6542	83.8702
	3.76412	1.2136	3.1016	0.00192476	1.3855	6.14274
	-8.17495	2.24851	-3.63572	0.000277202	-12.5819	-3.76796
	-59.6706	11.3602	-5.25261	1.49956e-07	-81.9361	-37.405
	-42.6889	3.98475	-10.7131	8.83825e-27	-50.4988	-34.8789
	79.976	6.39781	12.5005	7.41601e-36	67.4365	92.5155
	7.13983	0.826503	8.6386	5.69037e-18	5.51991	8.75975
	38.1463	9.21791	4.13828	3.49917e-05	20.0795	56.2131
	-11.0342	1.704	-6.47547	9.45175e-11	-14.374	-7.69441
	-79.1333	5.40431	-14.6426	1.50121e-48	-89.7256	-68.5411

## Sheet: ST6 Pros plm IR
	Lagged Variables	Parameter	Estimate (C.I.)	P-Value	Model Parameters	Value
		Interactive Models
		Comprehensive Interactive Cannabinoid Model - 0 Lags
		plm(Cancer Rate ~ Age + Cigarettes * THC * CBG * CBD + AUD + Income + Three Races)
		African.American	14.87 (12.68, 17.05)	1.99665e-40	S.D.	18.3479
		Cigarettes	85.16 (71.05, 99.27)	2.74446e-32	Adj.R-Squared	0.0398487
		Caucasian.American	105.12 (86.23, 124.01)	1.08713e-27	Chi Squ.	3927.53
		CBD	12.14 (9.71, 14.57)	1.33572e-22	Deg.Freedom	9
		Age	-2.11 (-2.71, -1.51)	5.68057e-12	P-Value	<2.2E-16
		THC: CBG: CBD	-43.36 (-50.02, -36.7)	2.59671e-37
		THC: CBG	-172.76 (-198.76, -146.76)	8.89104e-39
		THC: CBD	-135.01 (-153.1, -116.92)	1.864e-48
		THC	-541.34 (-611.86, -470.82)	3.67165e-51
		Comprehensive Interactive Cannabinoid Model - 2 Lags
		plm(Cancer Rate ~ Age + Cigarettes * THC * CBG * CBD + Two Races)
	THC, 2	Age	2.60324 (2.16, 3.05)	7.02838e-31	S.D.	14.826
	CBG, 2	Cigarettes	67.4332 (55.12, 79.75)	7.09609e-27	Adj.R-Squared	-0.00974263
	CBD,. 2	Black	6.98832 (5.02, 8.95)	3.11506e-12	Chi Squ.	5006.6
		CBD	-11.6559 (-19.11, -4.2)	0.00217592	Deg.Freedom	7
		CBG: CBD	-6.12463 (-8.31, -3.94)	4.16105e-08	P-Value	<2.2E-16
		THC: CBG	-5.4858 (-7.01, -3.96)	1.65469e-12
		CBG	-49.5082 (-59.26, -39.76)	2.47741e-23

## Sheet: ST7 Ov lme
	Parameter			Model
	Parameter	Estimate (C.I.)	P-Value	Sigma	AIC	BIC	LogLik
	Cannabis
	lme(Cancer Rate ~ Cannabis)
	Cannabis	-0.08 (-0.39, 0.23)	8.32e-09	1.38509	3120.45	3138.92	-1556.22	***
	Additive Model - Drugs
	lme(Cancer Rate ~ Age + Cigarettes + AUD + Cannabis + Analgesics + Cocaine
	Cigarettes	7.78 (5.31, 10.25)	0.0325	1.15652	2894.02	2930.92	-1439.01	*
	Cannabis	0.54 (0.14, 0.94)	0.0366					*
	AUD	-8.21 (-14.83, -1.6)	3.96e-05					***
	Analgesics	-8.55 (-14.74, -2.35)	8.53e-06					***
	Age	-0.27 (-0.33, -0.21)	2.13e-118					***
	Additive Model - Comprehensive
	lme(Cancer Rate ~ Age + Cigarettes + AUD + Cannabis + Analgesics + Cocaine + Income + Five Races)
	Cigarettes	7 (4.21, 9.78)	2.01e-29	1.11731	2855.55	2910.83	-1415.78	***
	Cannabis	0.64 (0.21, 1.06)	2.24e-14					***
	AIAN	-9.18 (-17.42, -0.94)	1.15e-09					***
	African	-0.33 (-0.57, -0.09)	2.59e-06					***
	White	-2.59 (-4.42, -0.76)	9.02e-05					***
	Analgesics	-8.97 (-15.03, -2.9)	4.5e-07					***
	AUD	-13.85 (-21.31, -6.39)	4.01e-10					***
	Age	-0.17 (-0.25, -0.09)	5.56e-25					***
	Asian	-0.75 (-1.05, -0.46)	5.01e-25					***
	Interactive Model - Comprehensive
	lme(Cancer Rate ~ Age + Cigarettes * AUD * Cannabis + Analgesics + Cocaine + Income + Five Races)
	Cannabis: AUD	56.9 (45.75, 68.05)	1.38e-25	1.00164	2710.51	2770.38	-1342.26	***
	Cigarettes: Cannabis	4.91 (3.36, 6.45)	6.19e-19					***
	Cocaine	31.8 (18.34, 45.27)	1.23e-13					***
	AUD	49.97 (25.75, 74.19)	6.75e-12					***
	AIAN	-15.15 (-24.34, -5.96)	1.23e-11					**
	Asian	-0.53 (-0.85, -0.21)	8.32e-10					**
	African	-0.47 (-0.74, -0.2)	4.12e-06					***
	Cannabis	-2.06 (-2.78, -1.34)	1.16e-08					***
	Age	-0.3 (-0.38, -0.22)	7.34e-12					***
	Cigarettes: Cannabis: AUD	-144.31 (-168.18, -120.45)	1.56e-14					***
	> lmeOvAllInAdd <- lme(CancRt ~ MedAge + cigmon + log(THCRt) + log(CBGRt) + log(CBDRt) + AUD + anlyr + cocyr +
	+ log(MHY) + White + log(Black) + AIAN + log(Hispanic) + log(Asian)-log(MHY)-cigmon -White ,
	+ weights= ~ sw, random = ~1| State, data = OvST)
	> tidy(lmeOvAllInAdd, conf.int=T)
	# A tibble: 14 x 10
	effect group term estimate std.error df statistic p.value conf.low conf.high							effect	group	statistic	p.value	conf.low	conf.high
	<chr> <chr> <chr> <dbl> <dbl> <dbl> <dbl> <dbl> <dbl> <dbl>							<chr>	<chr>	<dbl>	<dbl>	<dbl>	<dbl>
	1 fixed fixed (Intercept) 0.8369156 2.870703 689 0.2915368 7.707286e- 1 -4.799461 6.473292						1	fixed	fixed	0.291537	7.707286e- 1	-4.79946	6.47329
	2 fixed fixed MedAge -0.4951430 0.05093792 689 -9.720520 5.126401e-21 -0.5951552 -0.3951309						2	fixed	fixed	-9.72052	5.1264e-21	-0.595155	-0.395131
	3 fixed fixed log(THCRt) 2.901360 0.2803040 689 10.35076 1.950886e-23 2.351007 3.451713						3	fixed	fixed	10.3508	1.95089e-23	2.35101	3.45171
	4 fixed fixed log(CBGRt) -2.389067 0.3019688 689 -7.911636 1.013937e-14 -2.981956 -1.796178						4	fixed	fixed	-7.91164	1.01394e-14	-2.98196	-1.79618
	5 fixed fixed log(CBDRt) -0.6278822 0.1469431 689 -4.272962 2.200440e- 5 -0.9163921 -0.3393722						5	fixed	fixed	-4.27296	2.200440e- 5	-0.916392	-0.339372
	6 fixed fixed AUD -11.95043 2.845426 689 -4.199873 3.021384e- 5 -17.53718 -6.363682						6	fixed	fixed	-4.19987	3.021384e- 5	-17.5372	-6.36368
	7 fixed fixed anlyr 18.25914 2.795792 689 6.530937 1.269399e-10 12.76985 23.74844						7	fixed	fixed	6.53094	1.2694e-10	12.7698	23.7484
	8 fixed fixed cocyr 18.71761 6.437401 689 2.907635 3.758816e- 3 6.078335 31.35689						8	fixed	fixed	2.90763	3.758816e- 3	6.07834	31.3569
	9 fixed fixed log(Black) 0.8801903 0.2133048 689 4.126444 4.135072e- 5 0.4613849 1.298996						9	fixed	fixed	4.12644	4.135072e- 5	0.461385	1.299
	10 fixed fixed AIAN 29.60819 7.511599 689 3.941663 8.917934e- 5 14.85982 44.35656						10	fixed	fixed	3.94166	8.917934e- 5	14.8598	44.3566
	11 fixed fixed log(Hispanic) -2.070522 0.3466817 689 -5.972400 3.745308e- 9 -2.751201 -1.389842						11	fixed	fixed	-5.9724	3.745308e- 9	-2.7512	-1.38984
	12 fixed fixed log(Asian) -2.629421 0.2840434 689 -9.257109 2.612192e-19 -3.187116 -2.071726						12	fixed	fixed	-9.25711	2.61219e-19	-3.18712	-2.07173
	13 ran_pars State sd_(Intercept) 3.660553 NA NA NA NA 2.798468 4.788207						13	ran_pars	State	NA	NA	2.79847	4.78821
	14 ran_pars Residual sd_Observation 0.9001626 NA NA NA NA NA NA						14	ran_pars	Residual	NA	NA	NA	NA
	> glance(lmeOvAllInAdd)
	# A tibble: 1 x 4
		sigma	logLik	AIC	BIC					689	10.3508	1.95089e-23	2.35101	3.45171
		<dbl>	<dbl>	<dbl>	<dbl>					689	6.53094	1.2694e-10	12.7698	23.7484
	1	0.900163	-1330.24	2688.49	2752.95					689	4.12644	4.135072e- 5	0.461385	1.299
	> sigma(lmeOvAllInAdd)									689	3.94166	8.917934e- 5	14.8598	44.3566
	[1] 0.9001626									689	2.90763	3.758816e- 3	6.07834	31.3569
										689	-4.19987	3.021384e- 5	-17.5372	-6.36368
										689	-4.27296	2.200440e- 5	-0.916392	-0.339372
	> ## Cannabinoids as Main FX - 5-Way - Additive log(THCRt) + log(CBGRt) + log(CBDRt)									689	-5.9724	3.745308e- 9	-2.7512	-1.38984
	> summary(lme(CancRt ~ MedAge + cigmon + log(THCRt) + log(CBGRt) + log(CBDRt) + AUD + anlyr + cocyr +									689	-7.91164	1.01394e-14	-2.98196	-1.79618
	+ log(MHY) + White + log(Black) + AIAN + log(Hispanic) + log(Asian)-log(MHY)-cigmon -White ,									689	-9.25711	2.61219e-19	-3.18712	-2.07173
	+ weights= ~ sw, random = ~1| State, data = OvST))									689	-9.72052	5.1264e-21	-0.595155	-0.395131
	Linear mixed-effects model fit by REML
	Data: OvST
	AIC BIC logLik
	2688.49 2752.946 -1330.245
	Random effects:
	Formula: ~1 | State
	(Intercept) Residual
	StdDev: 3.660553 0.9001626
	Variance function:
	Structure: fixed weights
	Formula: ~sw
	Fixed effects: CancRt ~ MedAge + cigmon + log(THCRt) + log(CBGRt) + log(CBDRt) + AUD + anlyr + cocyr + log(MHY) + White + log(Black) + AIAN + log(Hispanic) + log(Asian) - log(MHY) - cigmon - White
	Value Std.Error DF t-value p-value
	(Intercept) 0.836916 2.870703 689 0.291537 0.7707
	MedAge -0.495143 0.050938 689 -9.720520 0.0000
	log(THCRt) 2.901360 0.280304 689 10.350760 0.0000
	log(CBGRt) -2.389067 0.301969 689 -7.911636 0.0000
	log(CBDRt) -0.627882 0.146943 689 -4.272962 0.0000
	AUD -11.950429 2.845426 689 -4.199873 0.0000
	anlyr 18.259142 2.795792 689 6.530937 0.0000
	cocyr 18.717611 6.437401 689 2.907635 0.0038
	log(Black) 0.880190 0.213305 689 4.126444 0.0000
	AIAN 29.608190 7.511599 689 3.941663 0.0001
	log(Hispanic) -2.070522 0.346682 689 -5.972400 0.0000
	log(Asian) -2.629421 0.284043 689 -9.257109 0.0000
	Correlation:
	(Intr) MedAge l(THCR l(CBGR l(CBDR AUD anlyr cocyr lg(Bl) AIAN lg(Hs)
	MedAge -0.849
	log(THCRt) -0.329 0.079
	log(CBGRt) 0.530 -0.262 -0.858
	log(CBDRt) -0.147 0.333 0.590 -0.366
	AUD 0.008 0.002 0.201 -0.058 0.256
	anlyr -0.041 -0.183 0.060 -0.108 -0.356 -0.271
	cocyr 0.216 -0.293 0.385 -0.132 0.338 -0.285 0.204
	log(Black) -0.020 -0.062 0.049 -0.025 -0.030 0.182 0.233 0.080
	AIAN 0.144 -0.216 -0.024 0.193 -0.211 -0.028 0.272 0.206 0.271
	log(Hispanic) 0.361 -0.209 -0.301 0.147 -0.179 -0.119 0.029 -0.125 -0.012 -0.102
	log(Asian) 0.412 -0.303 0.040 0.099 0.175 0.050 -0.174 0.162 -0.582 0.048 -0.325
	Standardized Within-Group Residuals:
	Min Q1 Med Q3 Max
	-8.76813417 -0.38422709 -0.03994631 0.30933993 9.55007547
	Number of Observations: 750
	Number of Groups: 50

## Sheet: ST8 Ov lme Cannbd
	Parameter			Model
	Parameter	Estimate (C.I.)	P-Value	Sigma	AIC	BIC	LogLik
	Additive Cannabinoid Model - Comprehensive
	lme(Cancer Rate ~ Age + Cigarettes + THC + CBG + CBD + AUD + Analgesics + Cocaine + Income + Five Races)
	THC	2.9 (2.35, 3.45)	1.95e-23	0.900163	-1330.24	2688.49	2752.95	***
	Analgesics	18.26 (12.77, 23.75)	1.27e-10					***
	African-American	0.88 (0.46, 1.3)	4.13507e-05					***
	AIAN	29.61 (14.86, 44.36)	8.91793e-05					***
	Cocaine	18.72 (6.08, 31.36)	0.00375882					**
	AUD	-11.95 (-17.54, -6.36)	3.02138e-05					***
	Cannabidiol	-0.63 (-0.92, -0.34)	2.20044e-05					***
	Hispanic	-2.07 (-2.75, -1.39)	3.74531e-09					***
	Cannabigerol	-2.39 (-2.98, -1.8)	1.01e-14					***
	Asian-American	-2.63 (-3.19, -2.07)	2.61e-19					***
	Median.Age	-0.5 (-0.6, -0.4)	5.13e-21					***
	Interactive Cannabinoid Model - Comprehensive
	lme(Cancer Rate ~ Age + Cigarettes * THC * CBG * CBD + AUD + Analgesics + Cocaine + Income + Five Races)
	THC: CBG: CBD	0.8 (0.7, 0.91)	3.04e-20	0.820257	2499.34	2582.11	-1231.67	***
	Cocaine	29.7 (15.85, 43.55)	1.44e-14					***
	Analgesics	11.07 (5.53, 16.61)	1.3e-11					***
	CBD	4.22 (1.23, 7.22)	2.26e-10					***
	CBG: CBD	1.04 (0.17, 1.92)	2.26e-08					***
	CBG	-8.83 (-13.14, -4.52)	4.33e-07					***
	Cigarettes: THC	-92.33 (-135.98, -48.68)	0.00161					**
	Cigarettes: THC: CBD	-27.95 (-39.21, -16.7)	0.00482					**
	AUD	-15.31 (-20.9, -9.72)	4.99e-09					***
	Cigarettes: THC: CBG	-36.91 (-49.82, -24)	3.35e-09					***
	Cigarettes: THC: CBG: CBD	-13.77 (-17.32, -10.23)	5.65e-10					***
	Age	-0.44 (-0.54, -0.34)	9.23e-14					***
	Asian	-1.93 (-2.33, -1.54)	1.46e-14					***
	Cigarettes: CBD	-47.51 (-55.52, -39.5)	5.45e-15					***
	> lmeOvAllInAdd <- lme(CancRt ~ MedAge + cigmon + log(THCRt) + log(CBGRt) + log(CBDRt) + AUD + anlyr + cocyr +
	+ log(MHY) + White + log(Black) + AIAN + log(Hispanic) + log(Asian)-log(MHY)-cigmon -White ,
	+ weights= ~ sw, random = ~1| State, data = OvST)
	> tidy(lmeOvAllInAdd, conf.int=T)
	# A tibble: 14 x 10
	effect group term estimate std.error df statistic p.value conf.low conf.high							effect	group	df	statistic	p.value	conf.low	conf.high
	<chr> <chr> <chr> <dbl> <dbl> <dbl> <dbl> <dbl> <dbl> <dbl>							<chr>	<chr>	<dbl>	<dbl>	<dbl>	<dbl>	<dbl>
	1 fixed fixed (Intercept) 0.8369156 2.870703 689 0.2915368 7.707286e- 1 -4.799461 6.473292						1	fixed	fixed	689	0.291537	7.707286e- 1	-4.79946	6.47329
	2 fixed fixed MedAge -0.4951430 0.05093792 689 -9.720520 5.126401e-21 -0.5951552 -0.3951309						2	fixed	fixed	689	-9.72052	5.1264e-21	-0.595155	-0.395131
	3 fixed fixed log(THCRt) 2.901360 0.2803040 689 10.35076 1.950886e-23 2.351007 3.451713						3	fixed	fixed	689	10.3508	1.95089e-23	2.35101	3.45171
	4 fixed fixed log(CBGRt) -2.389067 0.3019688 689 -7.911636 1.013937e-14 -2.981956 -1.796178						4	fixed	fixed	689	-7.91164	1.01394e-14	-2.98196	-1.79618
	5 fixed fixed log(CBDRt) -0.6278822 0.1469431 689 -4.272962 2.200440e- 5 -0.9163921 -0.3393722						5	fixed	fixed	689	-4.27296	2.200440e- 5	-0.916392	-0.339372
	6 fixed fixed AUD -11.95043 2.845426 689 -4.199873 3.021384e- 5 -17.53718 -6.363682						6	fixed	fixed	689	-4.19987	3.021384e- 5	-17.5372	-6.36368
	7 fixed fixed anlyr 18.25914 2.795792 689 6.530937 1.269399e-10 12.76985 23.74844						7	fixed	fixed	689	6.53094	1.2694e-10	12.7698	23.7484
	8 fixed fixed cocyr 18.71761 6.437401 689 2.907635 3.758816e- 3 6.078335 31.35689						8	fixed	fixed	689	2.90763	3.758816e- 3	6.07834	31.3569
	9 fixed fixed log(Black) 0.8801903 0.2133048 689 4.126444 4.135072e- 5 0.4613849 1.298996						9	fixed	fixed	689	4.12644	4.135072e- 5	0.461385	1.299
	10 fixed fixed AIAN 29.60819 7.511599 689 3.941663 8.917934e- 5 14.85982 44.35656						10	fixed	fixed	689	3.94166	8.917934e- 5	14.8598	44.3566
	11 fixed fixed log(Hispanic) -2.070522 0.3466817 689 -5.972400 3.745308e- 9 -2.751201 -1.389842						11	fixed	fixed	689	-5.9724	3.745308e- 9	-2.7512	-1.38984
	12 fixed fixed log(Asian) -2.629421 0.2840434 689 -9.257109 2.612192e-19 -3.187116 -2.071726						12	fixed	fixed	689	-9.25711	2.61219e-19	-3.18712	-2.07173
	13 ran_pars State sd_(Intercept) 3.660553 NA NA NA NA 2.798468 4.788207						13	ran_pars	State	NA	NA	NA	2.79847	4.78821
	14 ran_pars Residual sd_Observation 0.9001626 NA NA NA NA NA NA						14	ran_pars	Residual	NA	NA	NA	NA	NA
	> glance(lmeOvAllInAdd)
	# A tibble: 1 x 4
		sigma	logLik	AIC	BIC					0.280304	689	10.3508	1.95089e-23	2.35101	3.45171
		<dbl>	<dbl>	<dbl>	<dbl>					2.79579	689	6.53094	1.2694e-10	12.7698	23.7484
	1	0.900163	-1330.24	2688.49	2752.95					0.213305	689	4.12644	4.135072e- 5	0.461385	1.299
	> sigma(lmeOvAllInAdd)									7.5116	689	3.94166	8.917934e- 5	14.8598	44.3566
	[1] 0.9001626									6.4374	689	2.90763	3.758816e- 3	6.07834	31.3569
										2.84543	689	-4.19987	3.021384e- 5	-17.5372	-6.36368
										0.146943	689	-4.27296	2.200440e- 5	-0.916392	-0.339372
	> ## Cannabinoids as Main FX - 5-Way - Additive log(THCRt) + log(CBGRt) + log(CBDRt)									0.346682	689	-5.9724	3.745308e- 9	-2.7512	-1.38984
	> summary(lme(CancRt ~ MedAge + cigmon + log(THCRt) + log(CBGRt) + log(CBDRt) + AUD + anlyr + cocyr +									0.301969	689	-7.91164	1.01394e-14	-2.98196	-1.79618
	+ log(MHY) + White + log(Black) + AIAN + log(Hispanic) + log(Asian)-log(MHY)-cigmon -White ,									0.284043	689	-9.25711	2.61219e-19	-3.18712	-2.07173
	+ weights= ~ sw, random = ~1| State, data = OvST))									0.0509379	689	-9.72052	5.1264e-21	-0.595155	-0.395131
	Linear mixed-effects model fit by REML
	Data: OvST
	AIC BIC logLik
	2688.49 2752.946 -1330.245
	Random effects:
	Formula: ~1 | State
	(Intercept) Residual
	StdDev: 3.660553 0.9001626
	Variance function:
	Structure: fixed weights
	Formula: ~sw
	Fixed effects: CancRt ~ MedAge + cigmon + log(THCRt) + log(CBGRt) + log(CBDRt) + AUD + anlyr + cocyr + log(MHY) + White + log(Black) + AIAN + log(Hispanic) + log(Asian) - log(MHY) - cigmon - White
	Value Std.Error DF t-value p-value
	(Intercept) 0.836916 2.870703 689 0.291537 0.7707
	MedAge -0.495143 0.050938 689 -9.720520 0.0000
	log(THCRt) 2.901360 0.280304 689 10.350760 0.0000
	log(CBGRt) -2.389067 0.301969 689 -7.911636 0.0000
	log(CBDRt) -0.627882 0.146943 689 -4.272962 0.0000
	AUD -11.950429 2.845426 689 -4.199873 0.0000
	anlyr 18.259142 2.795792 689 6.530937 0.0000
	cocyr 18.717611 6.437401 689 2.907635 0.0038
	log(Black) 0.880190 0.213305 689 4.126444 0.0000
	AIAN 29.608190 7.511599 689 3.941663 0.0001
	log(Hispanic) -2.070522 0.346682 689 -5.972400 0.0000
	log(Asian) -2.629421 0.284043 689 -9.257109 0.0000
	Correlation:
	(Intr) MedAge l(THCR l(CBGR l(CBDR AUD anlyr cocyr lg(Bl) AIAN lg(Hs)
	MedAge -0.849
	log(THCRt) -0.329 0.079
	log(CBGRt) 0.530 -0.262 -0.858
	log(CBDRt) -0.147 0.333 0.590 -0.366
	AUD 0.008 0.002 0.201 -0.058 0.256
	anlyr -0.041 -0.183 0.060 -0.108 -0.356 -0.271
	cocyr 0.216 -0.293 0.385 -0.132 0.338 -0.285 0.204
	log(Black) -0.020 -0.062 0.049 -0.025 -0.030 0.182 0.233 0.080
	AIAN 0.144 -0.216 -0.024 0.193 -0.211 -0.028 0.272 0.206 0.271
	log(Hispanic) 0.361 -0.209 -0.301 0.147 -0.179 -0.119 0.029 -0.125 -0.012 -0.102
	log(Asian) 0.412 -0.303 0.040 0.099 0.175 0.050 -0.174 0.162 -0.582 0.048 -0.325
	Standardized Within-Group Residuals:
	Min Q1 Med Q3 Max
	-8.76813417 -0.38422709 -0.03994631 0.30933993 9.55007547
	Number of Observations: 750
	Number of Groups: 50

## Sheet: ST9 Ov SG
	Parameter	Estimate (C.I.)	P-Value
	Cannabis
	svyglm(Cancer Rate ~ Cannabis)
	Cannabis	1.39 (-1.3, 4.07)	0.3162
	THC
	svyglm(Cancer Rate ~ THC Exposure)
	THC Exposure	0.33 (-0.62, 1.28)	0.504
	Cannabigerol
	svyglm(Cancer Rate ~ Cannabigerol Exposure)
	Cannabigerol Exposure	0.57 (-0.92, 2.06)	0.4575	**
	Cannabidiol
	svyglm(Cancer Rate ~ Cannabidiol Exposure)
	Cannabidiol Exposure	1.02 (0.4, 1.65)	0.0025	**
	Additive Model - Drugs
	svyglm(Cancer Rate ~ Age + Cigarettes + AUD + Cannabis + Analgesics + Cocaine
	Cigarettes	21.3 (19.07, 23.53)	<2.2E-16
	Cannabis	1.59 (0.5, 2.68)	0.0064
	Interactive Model - Drugs
	svyglm(Cancer Rate ~ Age + Cigarettes * AUD * Cannabis + Analgesics + Cocaine + Income + Five Races)
	AUD	158.42 (143.2, 173.63)	<2.2E-16
	Cigarettes	102.97 (85.8, 120.13)	5.06e-15
	Cigarettes: Cannabis	19.91 (12.27, 27.55)	7.17e-06
	Cigarettes: Cannabis: AUD	-153.01 (-255.97, -50.04)	0.00566
	Cigarettes: AUD	-1001.51 (-1240.79, -762.23)	2.44e-10
	Cocaine	-90.03 (-107.66, -72.39)	8.46e-13

[truncated: 4 more sheets: ST10 Ov SG Cannbd, ST11 Ov plm Intro, ST12 Ov plm Add, ST13 Ov plm IR]
